# Supplementary material for: A multiscale cerebral neurochemical connectome of the rat brain
Source: PLoS Biol. 2017 Jul 3;15(7):e2002612. doi: 10.1371/journal.pbio.2002612 (PMC5507471; doi:10.1371/journal.pbio.2002612)
Supplement: S7 Table — (XLSX) [file pbio.2002612.s021.xlsx]

## Sheet: Intraregional connections
		OB		PFC				Insula		Accumbens		Cpu	Septum					BNST																					GP			Hyt
	O/I	MOB	AOB	IfCo	PrCo	ACC	lPFC	InCoa	InCop	AcbSh	AcbC	Cpu	LS	MS	DB	SF	TRS	BNSTtr	BNSTdm	BNSTdl	BNSTjc	BNSTsc	BNSTmc	BNSTpr	BNSTvl	BNSTvm	BNSTal	BNSTfu	BNSTif	BNSTrh	BNSTam	BNSTad	BNSTav	BNSTv	BNSTov	BNSTpm	BNSTpl	BNSTpo	GP	VP	EP	AHN	LPO	MPO	PVH	PHN	PM	SCH	TUM
OB	MOB
	AOB
PFC	IfCo				[1]	[1]
	PrCo			[1]		[1]
	ACC			[1]	[1]
	lPFC				[1]	[1]
Insula	InCoa								[1-3]
	InCop								[2, 3]
Accumbens	AcbSh									GABA[1, 2]	GABA[1, 2]
	AcbC									GABA[1, 2]	GABA[1, 2]
Cpu	Cpu
Septum	LS													GABA[1]
	MS												GABA[1, 2]
	DB												GABA[1]
	SF
	TRS
BNST	BNSTtr																		[1]					[2]						[3]
	BNSTdm																						[4]	[5]				[6]		[3]				[4]
	BNSTdl																							[5]
	BNSTjc																		[1]											[3]
	BNSTsc
	BNSTmc																	[2]	[1]					[2, 5]					[2]					[4]
	BNSTpr																												[2]
	BNSTvl
	BNSTvm
	BNSTal																		[1]		[7]		[4]	[5]				[6]						[4]	[6]
	BNSTfu																	[2]	[1]				[4]							[3]				[4]	[6]
	BNSTif																		[1]					[2, 5]						[3]
	BNSTrh																	[2]	[1]				[4]					[6]						[4]	[6]
	BNSTam																		[1]				[4]	[2]					[2]					[4]
	BNSTad																							[2, 5]				[6]	[2]	[3]					[6]
	BNSTav																							[5]						[3]
	BNSTv																	[2]	[1]				[4]	[2, 5]					[2]	[3]
	BNSTov																		[1]		[6]						[6]	[6]	[6]	[3, 6]
	BNSTpm
	BNSTpl
	BNSTpo
GP	GP																																								[1]
	VP
	EP																																						GABA[2-6]	GABA[5]
Hyt	AHN																																										[1]			[2]	[3-5]		[6]
	LPO																																									[15, 16]				[2]
	MPO																																									[15]	[18]		[18, 19]		[4, 5, 20, 21]	[22, 23]	[20, 21]
	PVH																																									GLU/ASP; CRF[15, 25, 26]	GLU/ASP[25, 27]	GLU/ASP;ENK; CRF[11, 25-29]	[30]	[27]	GLU/ASP[4, 25, 27, 30]	GLU/ASP; VIP[22, 23, 25, 31]	[6]
	PHN																																									[15]		[36]			[4, 5, 36]	[22, 36]	[6, 36]
	PM																																									[15, 16, 37]		[37]	[16]		[4, 37]
	SCH																																											[38]	[38]	[38]	[38]		[38]
	TUM																																									[15]					[4]
	ARC																																									[15, 16]	ENK[7, 32]	ENK[29, 32]	ENK[32]		ENK[3, 4, 32]	[22, 43]
	DMH																																									[15, 16, 30, 39, 40]		[29, 39, 40]	[30, 39-41, 44]	[40]	[4, 5, 30, 39, 40, 45]	GABA ;VAS[22, 23, 39-41]	[40]
	LH																																									[15, 39]	[1]	[1, 29, 39]	[30]	[2, 39]	[4, 5, 39]
	MM																																									[47]	[47, 48]	[1, 47, 48]		[47, 48]	[4, 5, 47, 49]		[48]
	PeVH																																									[15]	[1]	[29]			[3, 4]	[31]
	SUM																																									[15, 16, 43, 52]	GLU/ASP[1, 52, 53]	GLU/ASP[29, 52, 53]		[2]	GLU/ASP[4, 5, 52, 53]
	SO																																									[15]			[16]		[4]	[54]
	VMH																																									[15, 16, 30, 31, 39, 56]	[56]	[1, 29, 39, 56]	[30, 39, 56]	[39, 56]	[3-5, 30, 39, 56]	[14, 39, 43, 56]
Amyg	CeA
	MEA
	LA
	BLA
	BMA
	BA
	ABA
	COA
	PA
	NLOT
	BAOT
Hb	mHb
	lHb
Hc	PRE
	POST
	PARA
	SUB
	ENT
	DG
	CA1
	CA2
	CA3
	phCo
	PosCo
Th	AM
	AV
	CL
	CM
	IMD
	LGN
	MGN
	RE
	PCN
	PF
	PT
	PVT
	RT
	VL
	VM
	AD
	IAM
	LD
	LP
	MD
	RH
	SPF
	POT
	NSM
	AL
STh	STh
SN	SNr
	SNc
	SNl
VTA	RLN
	CLN
	PNN
	PBNp
	IFN
Raphe	DRN
	MRN
	RM
	RPO
	RPA
	RO
Lc	LC
Pons	PBNl
	PBNm
	KF
	PON
[truncated: 77 more columns]
